# Supplementary material for: In vivo delivery of CRISPR-Cas9 using lipid nanoparticles enables antithrombin gene editing for sustainable hemophilia A and B therapy
Source: PubMed Central journal article supplement — Sci Adv. 2022 Jan 21;8(3):eabj6901. doi: 10.1126/sciadv.abj6901 (PMC8782450; doi:10.1126/sciadv.abj6901), 2022-01-21
Supplement: sciadv.abj6901_sm.pdf [file sciadv.abj6901_sm.pdf]

## Supplementary Materials for

### **In vivo delivery of CRISPR-Cas9 using lipid nanoparticles enables antithrombin gene editing for sustainable hemophilia A and B therapy**

Jeong Pil Han, MinJeong Kim, Beom Seok Choi, Jeong Hyeon Lee, Geon Seong Lee, Michaela Jeong, Yeji Lee, Eun-Ah Kim, Hye-Kyung Oh, Nanyeong Go, Hyerim Lee, Kyu Jun Lee, Un Gi Kim, Jae Young Lee, Seokjoong Kim, Jun Chang, Hyukjin Lee\*, Dong Woo Song\*, Su Cheong Yeom\*

\*Corresponding author. Email: [hyukjin@ewha.ac.kr](mailto:hyukjin@ewha.ac.kr) (H.L.); [dw.song@toolgen.com](mailto:dw.song@toolgen.com) (D.W.S.); [scyeom@snu.ac.kr](mailto:scyeom@snu.ac.kr) (Y.S.C.)

Published 21 January 2022, *Sci. Adv.* **8**, eabj6901 (2022)  
DOI: [10.1126/sciadv.abj6901](https://doi.org/10.1126/sciadv.abj6901)

#### **This PDF file includes:**

Figs. S1 to S8  
Tables S1 and S2

**Fig. S1.**

**A**

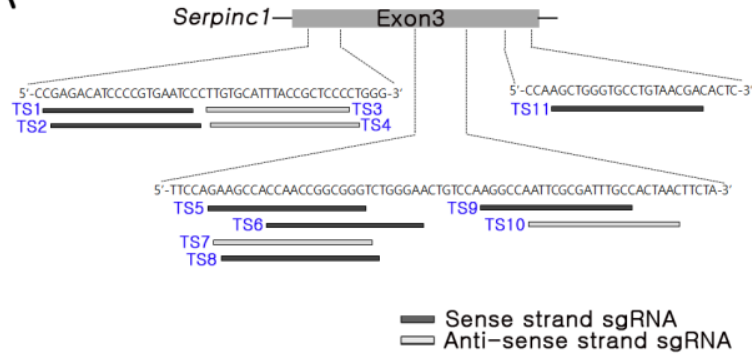

**B**

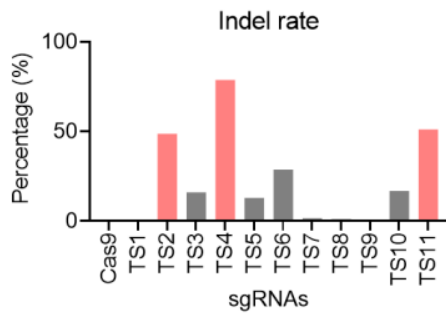

**C**

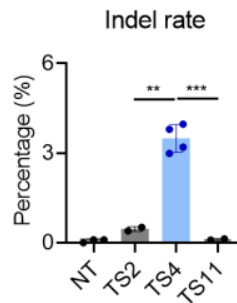

**Fig. S1.** Screening of sgRNAs targeting the *Serpinc1* gene in C2C12 cells. **(A)** Target sites (TS) and sequences surrounding the exon 3 of mouse *Serpinc1* gene. TSs located on the sense or anti-sense strand are indicated in black or gray boxes, respectively. **(B)** Indel frequencies induced by the tested sgRNAs. Frequencies were measured by targeted deep sequencing in the C2C12 cell line. **(C)** LNP-mediated activity test of the three selected sgRNAs in mouse primary hepatocyte. Indel frequencies were measured by targeted deep sequencing after 2 days of the treatment. NT indicates no treatment. Data were presented as mean  $\pm$  SEM. \*\*,  $p < 0.01$ ; \*\*\*,  $p < 0.001$ .

**Fig. S2.**

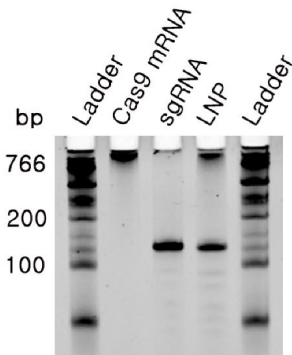

**Fig. S2.** Gel electrophoresis assay of LNPs encapsulating Cas9 mRNA/sgRNA in a 1:1 ratio by weight. After PAGE gel analysis, intact band intensities were quantified with Image Lab software. LNPs were formulated in 7 mM citrate buffer, and most of the highly modified sgRNAs were not encapsulated. (mRNA 100% → 13%, sgRNA 100% → 70%).

**Fig. S3.**

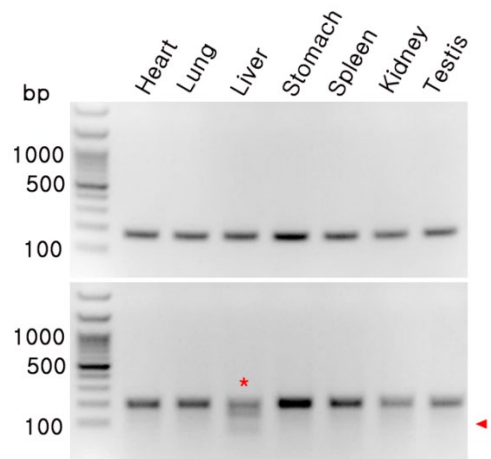

**Fig. S3.** Identification of indels using T7E1 analysis in various tissues. The LNP-CRISPR-mAT developed detectable indels only in the liver tissue.

**Fig. S4.**

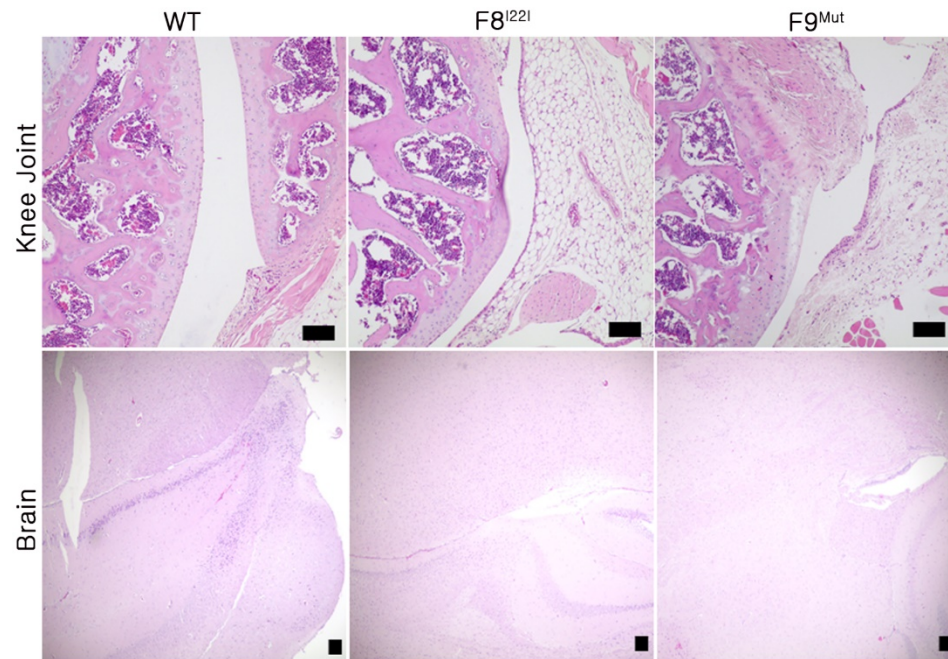

**Fig. S4.** Histological analysis of the knee joint and brain was conducted on the WT, F8<sup>221</sup>, and F9<sup>Mut</sup> mice. The articular cavity and cerebrum were examined, but no bleeding lesions were detected in the mice. Scale bar = 100 μm.

**Fig. S5.**

**A**

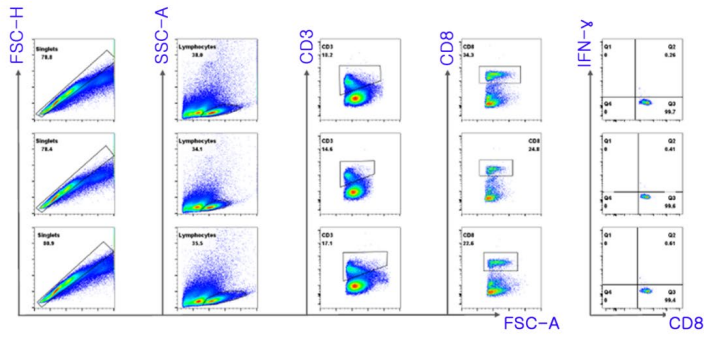

**B**

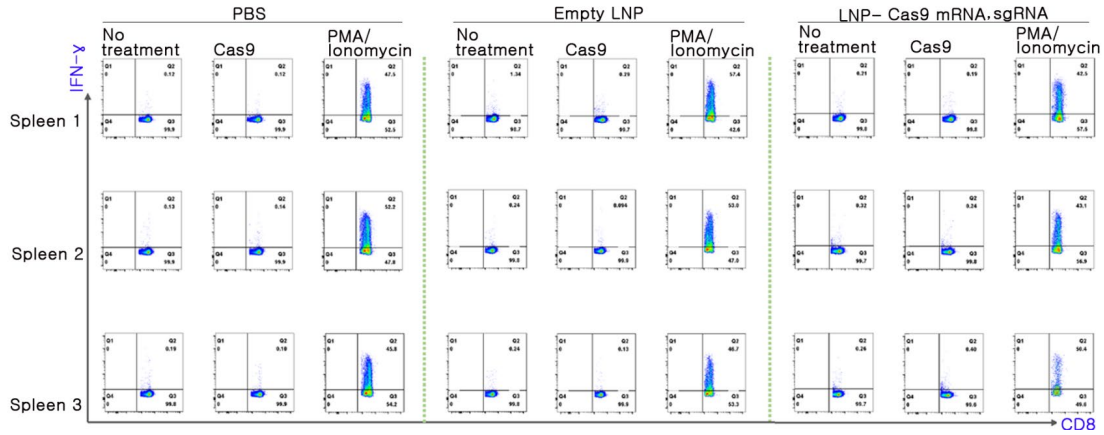

**Fig. S5.** Flow cytometry showing gating strategy and the analysis of IFN- $\gamma$  expression in CD8+ T cells stimulated with Cas9 protein. **(A)** CD3+ antibody was used for T cells, then CD8+ was used for CD8+ T cells. Gates for IFN- $\gamma$  expressing CD8+ T cells were drawn based on PBS injected control mice (n=3). **(B)** IFN- $\gamma$  expression in CD8+ T cells was not detected in mice (n=3).

**Fig. S6.**

**A**

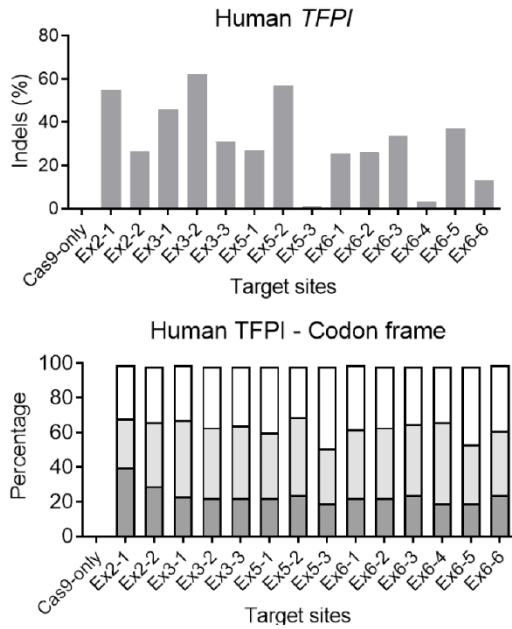

**B**

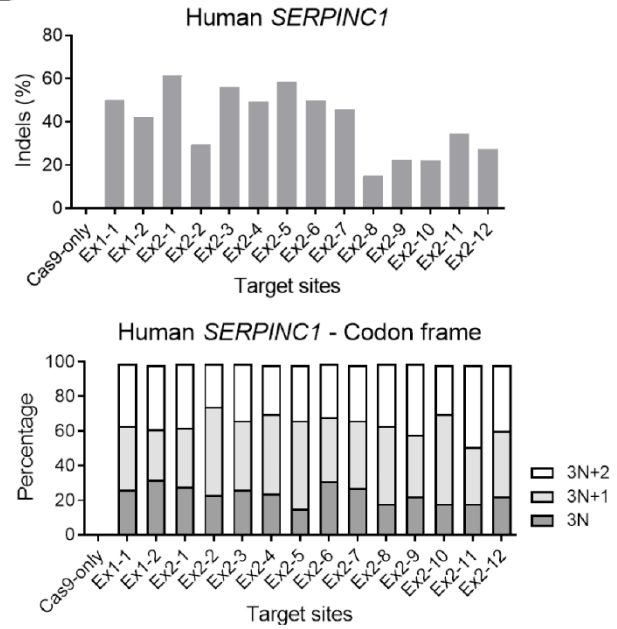

**Fig. S6.** Indel frequencies and codon frame patterns at human *TFPI* (**A**) and *SERPINC1* (**B**) target sites in the Jurkat cell line. Frequencies were measured by targeted deep sequencing (upper panel), and percent values of the in-frame (3N) and out-of-frame (3N+1 and 3N+2) indels were analyzed (lower panel) at each TS.

**Fig. S7.**

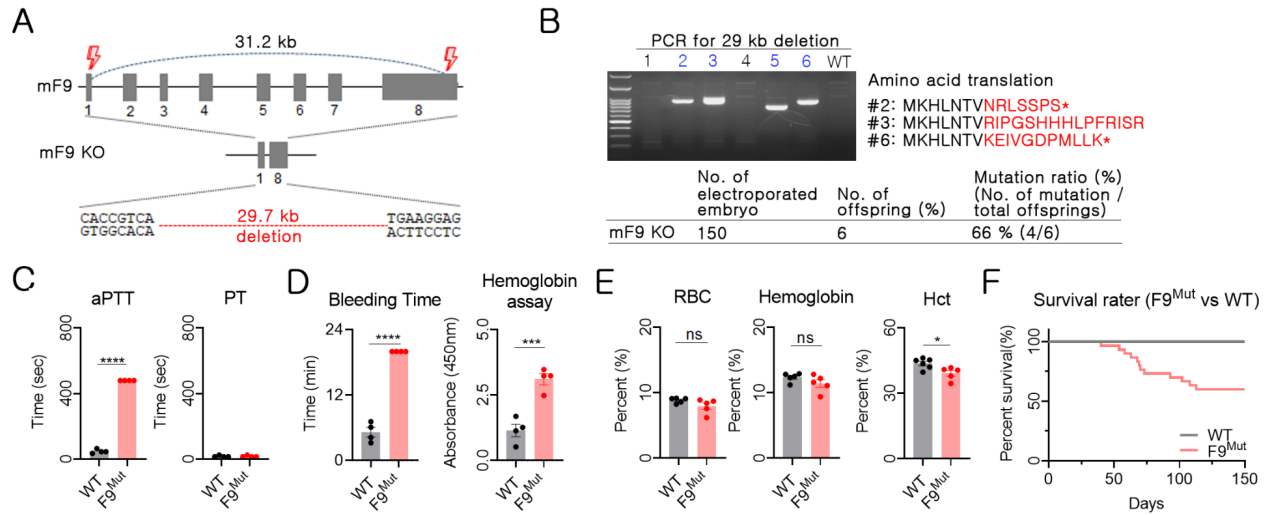

**Fig. S7.** Generation of Factor IX (F9) knock-out (KO) mouse (F9mut) and phenotype analysis. **(A)** Brief strategy for generation of F9Mut mice and the expected deletion. Two double-stranded DNA breakages (DSBs) were induced using CRISPR/Cas9 in exons 1 and 8 (Thunder symbol: DSB site, gray box: exon). **(B)** Genotyping of the produced F9Mut pups using polymerase chain reaction and Sanger sequencing-mediated translation prediction (Blue digits: KO pups, red letters: translated amino acid residues, \*: stop codon). **(C)** Partial thromboplastin time (PT) and activated partial thromboplastin time (aPTT). **(D)** In vivo bleeding (wild-type [WT]: n = 4, F9Mut: n = 4), showing coagulation activity. **(E)** Complete blood count (WT: n = 5, F9Mut: n = 5). Each dot represents data from an individual mouse. Data for **C**, **D** and **E** are presented as mean  $\pm$  standard error of mean, calculated using unpaired Student's t-test. (ns : not significant, \* :  $p < 0.05$ , \*\*\* :  $p < 0.001$ , \*\*\*\*:  $p < 0.0001$ ) **(F)** Survival rate in WT and F9Mut mice for 5 months after birth (WT: n = 29, F9Mut: n = 30), statistically analyzed using the Mantel-Cox test.



**Fig. S8.**

**A**

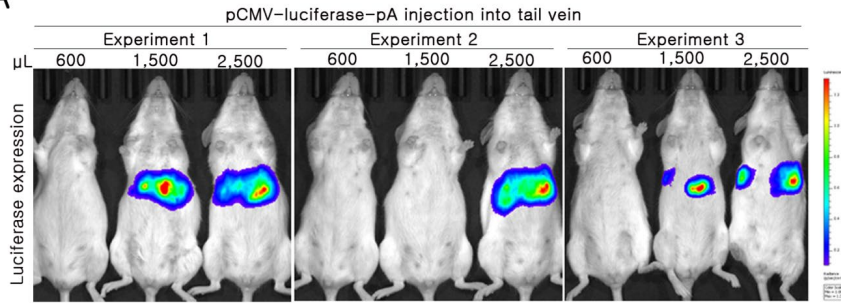

**B**

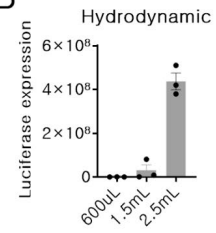

**Fig. S8.** 20ug of luciferase plasmid (pCMV-Luciferase-pA) was prepared with a total volume of 600µL, 1,500µL, and 2,500µL solution and injected into the tail vein. A bioluminescence signal was measured. **(A)** Image for in vivo bioluminescence signal detection. **(B)** Quantification of bioluminescence signal.

**Table S1.**

| Targets | Chr   | Location  | Sequence(5' to 3')                     | Related genes              |
|---------|-------|-----------|----------------------------------------|----------------------------|
| ON(TS4) | Chr1  | 160989494 | TGTGCATTTACCGCTCCCCTGGG                | <i>Serpinc1</i>            |
| Off1    | Chr4  | 115922991 | TGTACATTCACCTCTCCCCTTGG                | Intron( <i>Dmbx1</i> )     |
| Off2    | Chr7  | 80080647  | TGTGCACTTACCGAACCCCTGGG                | Intron( <i>Zfp710</i> )    |
| Off3    | Chr9  | 42792265  | TATGCATTTACTGCTCACCTGGG                | Intron( <i>Grik4</i> )     |
| Off4    | Chr10 | 53752760  | TGTGCATTTTCTGCTCCCTTAAG                | Intergenic                 |
| Off5    | Chr14 | 59818497  | TGTGCATTTAATGCTCCCCATAG                | Intron( <i>Atp8a2</i> )    |
| Off6    | Chr18 | 53480031  | TGAGCATTTACCGCCTCCCTCAG                | Intron( <i>Prdm6</i> )     |
| Off7    | Chr18 | 86859014  | TGTGCATTTACAGTTCCCATGGG                | Intergenic                 |
| Di-Off1 | Chr4  | 115922998 | TGTACATTCACCTCTCCCCTTGGG               | Intergenic( <i>dmbx1</i> ) |
| Di-Off2 | Chr9  | 56223771  | G-GC-TCTCCGCACCGGACCCGGT<br>CCCGAC-GGG | Intergenic( <i>peak1</i> ) |
| Di-Off3 | Chr10 | 69926267  | TATGCAAATACCCCTCCCCTTGG                | Intergenic( <i>ank3</i> )  |

**Table S1.** Off-target sites. Off1 – Off7 were selected by in-silico based methods and Di-Off1 – Di-Off3 were found in the Digenoe-seq analysis. In the Digenome-seq, the on-target site showed the highest cleavage score (ON, 166.5; Di-Off1, 5.3; Di-Off2, 9.7; Di-Off3, 11.9)

**Table S2.**

| Target gene  |   | Sequence (5'-3')                       | Product size |
|--------------|---|----------------------------------------|--------------|
| mAT On (TS4) | F | 5'-AGGAATAAGACTGTGGTGGTC-3'            | 279bp        |
|              | R | 5'-TTGGCCTTGGACAGTTCCCAG-3'            |              |
| mAT Off1     | F | 5'-GGCATTGAGTACTGATGACTGC-3'           | 178bp        |
|              | R | 5'-AGAATAAGTACTGGAGCGTCTG-3'           |              |
| mAT Off2     | F | 5'-GGCAGAGTCAGTCAGGAGG-3'              | 202bp        |
|              | R | 5'-GTAGTTGTAGGCGGTCTAGAAC-3'           |              |
| mAT Off3     | F | 5'-CTCCCAAACCAGGCCTTGGC-3'             | 216bp        |
|              | R | 5'-TTCTTGTCTTGAGGCTGCTGC-3'            |              |
| mAT Off4     | F | 5'-CAGTACTTCAGTAGTAGACCTTCC-3'         | 220bp        |
|              | R | 5'-CAAGATATCTCTGGCTGTTCTC-3'           |              |
| mAT Off5     | F | 5'-AGTAGTATGGATGGGGACTGG-3'            | 219bp        |
|              | R | 5'-GTTGCAGGTGGATGCAGG-3'               |              |
| mAT Off6     | F | 5'-GCTCCAAGATTTTCATGAGTTCAG-3'         | 231bp        |
|              | R | 5'-CCATTAGGCTGGAGCCTGG-3'              |              |
| mAT Off7     | F | 5'-GCAAAACGTGTAGGCTTGC-3'              | 150bp        |
|              | R | 5'-AAGAGTCTCAACACAGTGCAC-3'            |              |
| mAT Di-Off1  | F | 5'- ACTTGCTTTGGGCATTGAGT -3'           | 165bp        |
|              | R | 5'- GGGATTGGAACATGACCGTA-3'            |              |
| mAT Di-Off2  | F | 5'- ACGTGC GTTCAACGTGACGG -3'          | 172bp        |
|              | R | 5'- GAAGGAGCCTCGGTTGGCC-3'             |              |
| mAT Di-Off3  | F | 5'- GTACTCCCAACCAGTCGTG -3'            | 190bp        |
|              | R | 5'- TCCAAATGTAAAACAGTAAACAGAT<br>CA-3' |              |

**Table S2.** Primer information used in this study
